# Supplementary material for: Drug-Initiated Activity Metabolomics Identifies Myristoylglycine as a Potent Endogenous Metabolite for Human Brown Fat Differentiation
Source: MDPI journal article supplement (doi:10.3390/metabo12080749), 2022-08-16
Supplement: s1 [file s1]

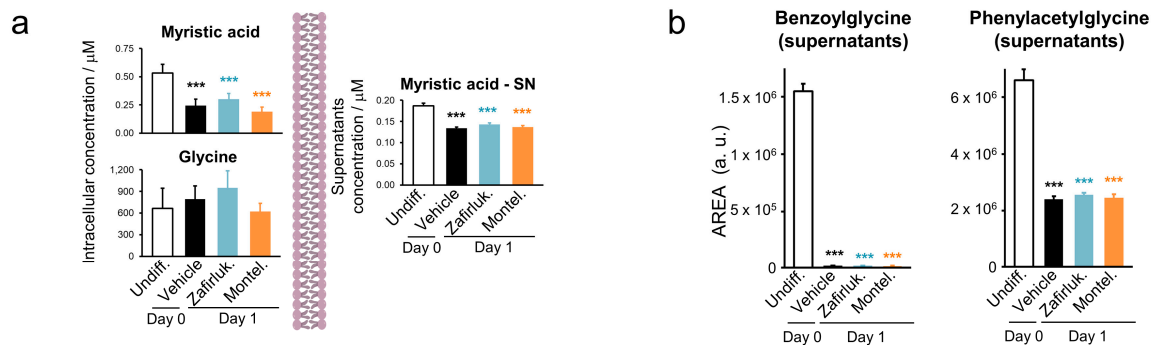

**Figure S1.** Bar plots of myristoylglycine-related metabolites during SBGS cells differentiation in the presence of zafirlukast and montelukast. **(a)** Absolute quantitation of myristic acid and glycine in SBGS cells in differentiation and their supernatants (myristic acid only). **(b)** Bar plots of glycine conjugated metabolites that were found to be dysregulated in the supernatants of the SBGS cells after 1 day of differentiation. \*\*\*  $p < 0.001$ , one-way ANOVA followed by a Tukey's honestly significant difference *posthoc* test. N = 6 biological replicates per treatment.
